# Supplementary material for: Transient Downregulation of Nanog and Oct4 Induced by DETA/NO Exposure in Mouse Embryonic Stem Cells Leads to Mesodermal/Endodermal Lineage Differentiation
Source: Hindawi journal article supplement (doi:10.1155/2014/379678), 2014-01-01

**Supplementary figure 1. Re-expression of pluripotency genes following exposure to DETA/NO.** Western blot analysis of Nanog and Oct4 proteins. D3 mESCs were grown in the presence (+LIF) or in the absence (-LIF) of LIF for 3 days. Cells were then cultured as indicated in *Materials and Methods* for additional periods of 2 and 4 days (day 6 and day 8). C: control cells. T: cells exposed to 1mM DETA/NO for 19 h on day 4. Lanes 5 and 6 refers to cells exposed to DETA/NO and subsequently cultured for 2 and 4 days as in *Materials and Methods*

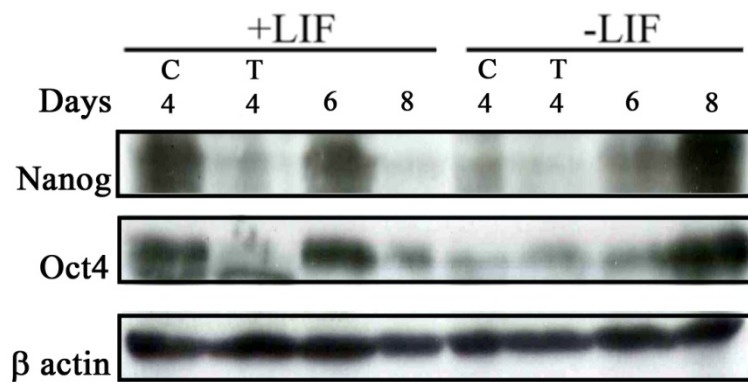

**Supplementary figure 2. Acetylation of histone H3 at Brachyury promoter is regulated by DETA/NO.** ChIP assay followed by PCR to determine the occupancy of H3 acetylated at the Brachyury promoter. Primer set -231/-13 from AUG.

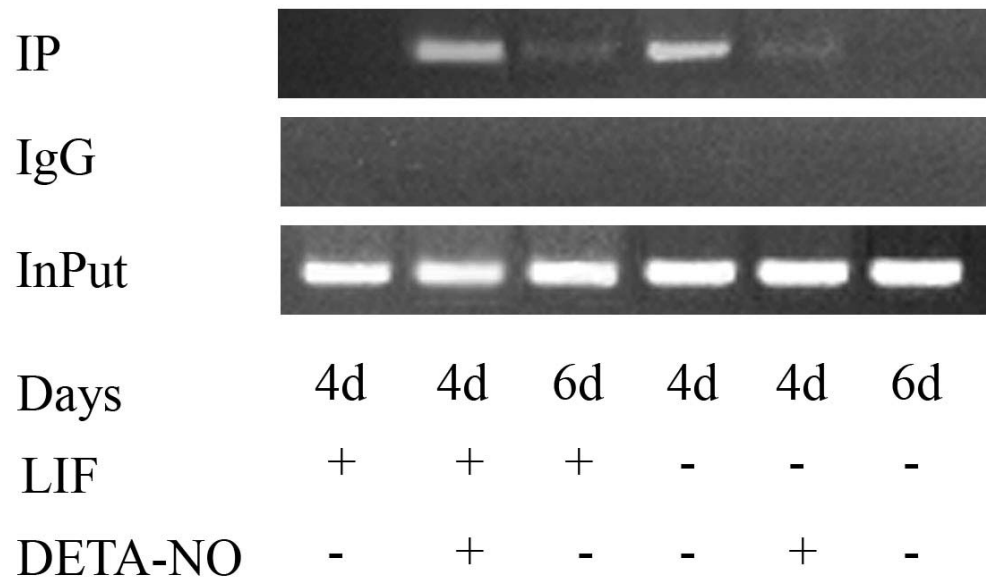

Supplement: f1 [file 379678.f1.pdf]
